# Supplementary material for: Rhizosphere 16S-ITS Metabarcoding Profiles in Banana Crops Are Affected by Nematodes, Cultivation, and Local Climatic Variations
Source: PubMed Central journal article supplement (PMC9218937; doi:10.3389/fmicb.2022.855110), 2022-06-09

**Supplementary Figure 1.** Relationship between densities of *Helicotylenchus* spp. and *Pratylenchus goodeyi*, in sampled soils.

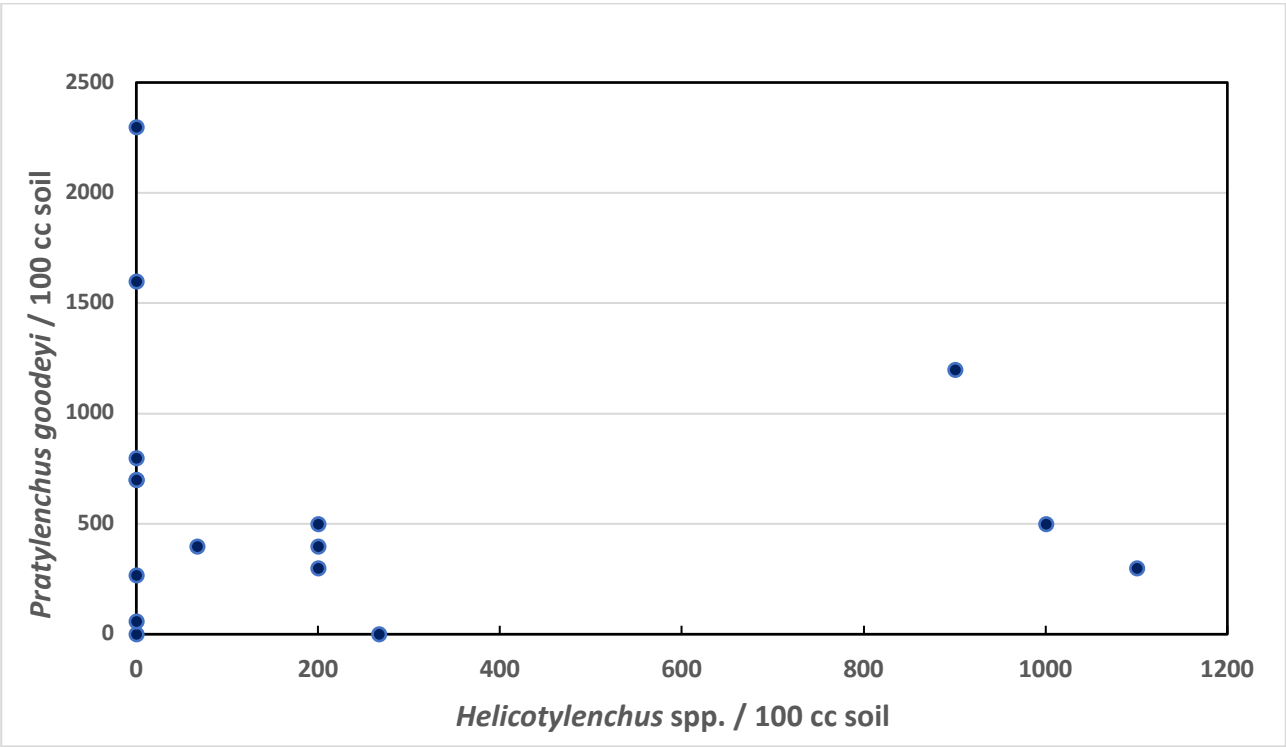

Supplement: Image_1.pdf [file Image_1.pdf]
