# Supplementary material for: Rhizosphere 16S-ITS Metabarcoding Profiles in Banana Crops Are Affected by Nematodes, Cultivation, and Local Climatic Variations
Source: PubMed Central journal article supplement (PMC9218937; doi:10.3389/fmicb.2022.855110), 2022-06-09

**Supplementary Figure 3.** Bar plots based on ITS sequence data showing differential abundance of taxa at the order level, in samples grouped by crop and latitude (horizontal bars show group means).

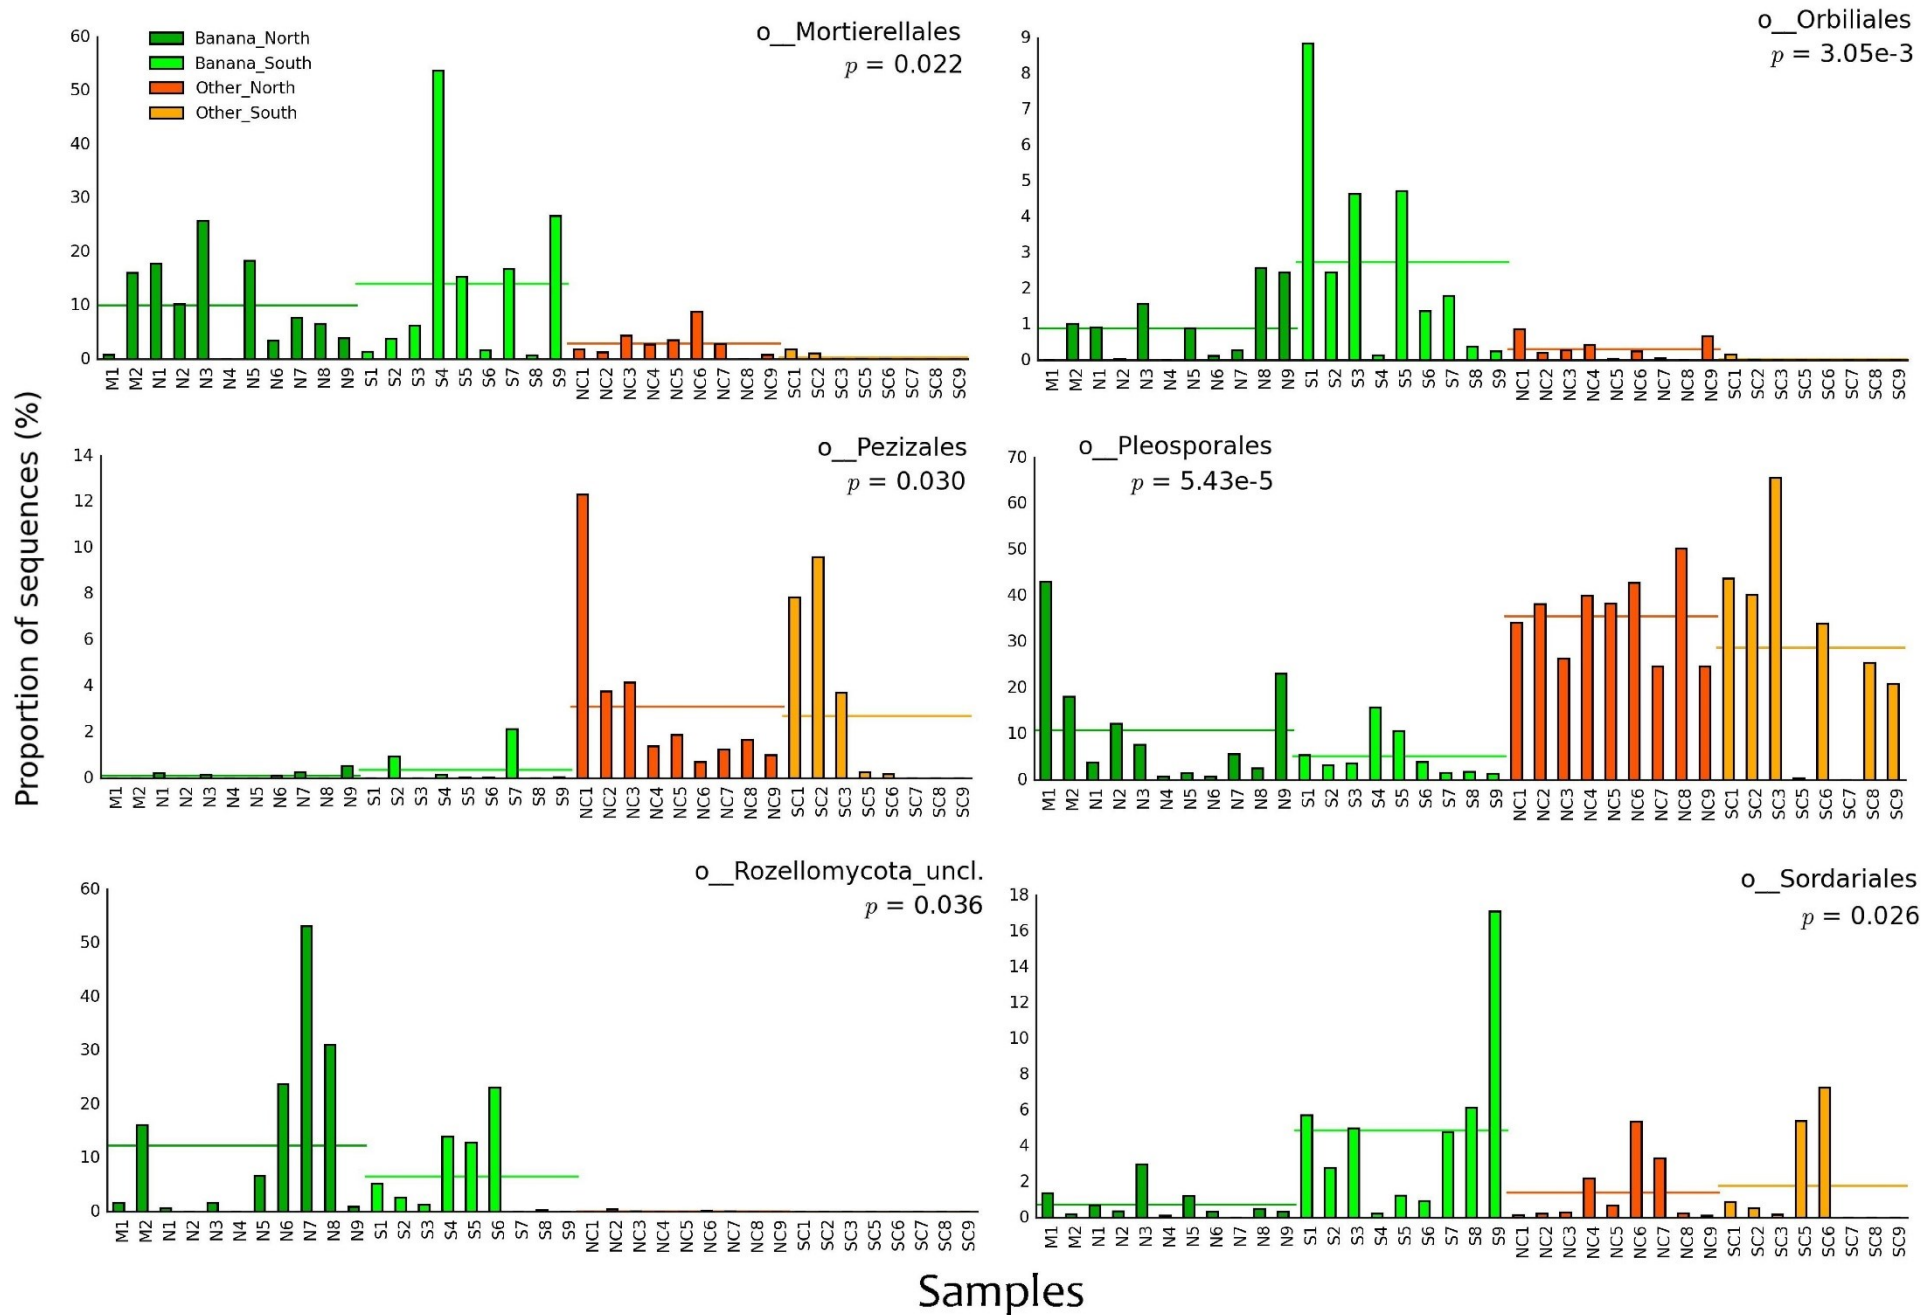

Supplement: Image_3.pdf [file Image_3.pdf]
