# Supplementary material for: Rhizosphere 16S-ITS Metabarcoding Profiles in Banana Crops Are Affected by Nematodes, Cultivation, and Local Climatic Variations
Source: PubMed Central journal article supplement (PMC9218937; doi:10.3389/fmicb.2022.855110), 2022-06-09

**Supplementary Figure 5.** ITS sequence proportions of plant pathogenic fungi in banana and other adjacent control samples, shown by crop and latitude.

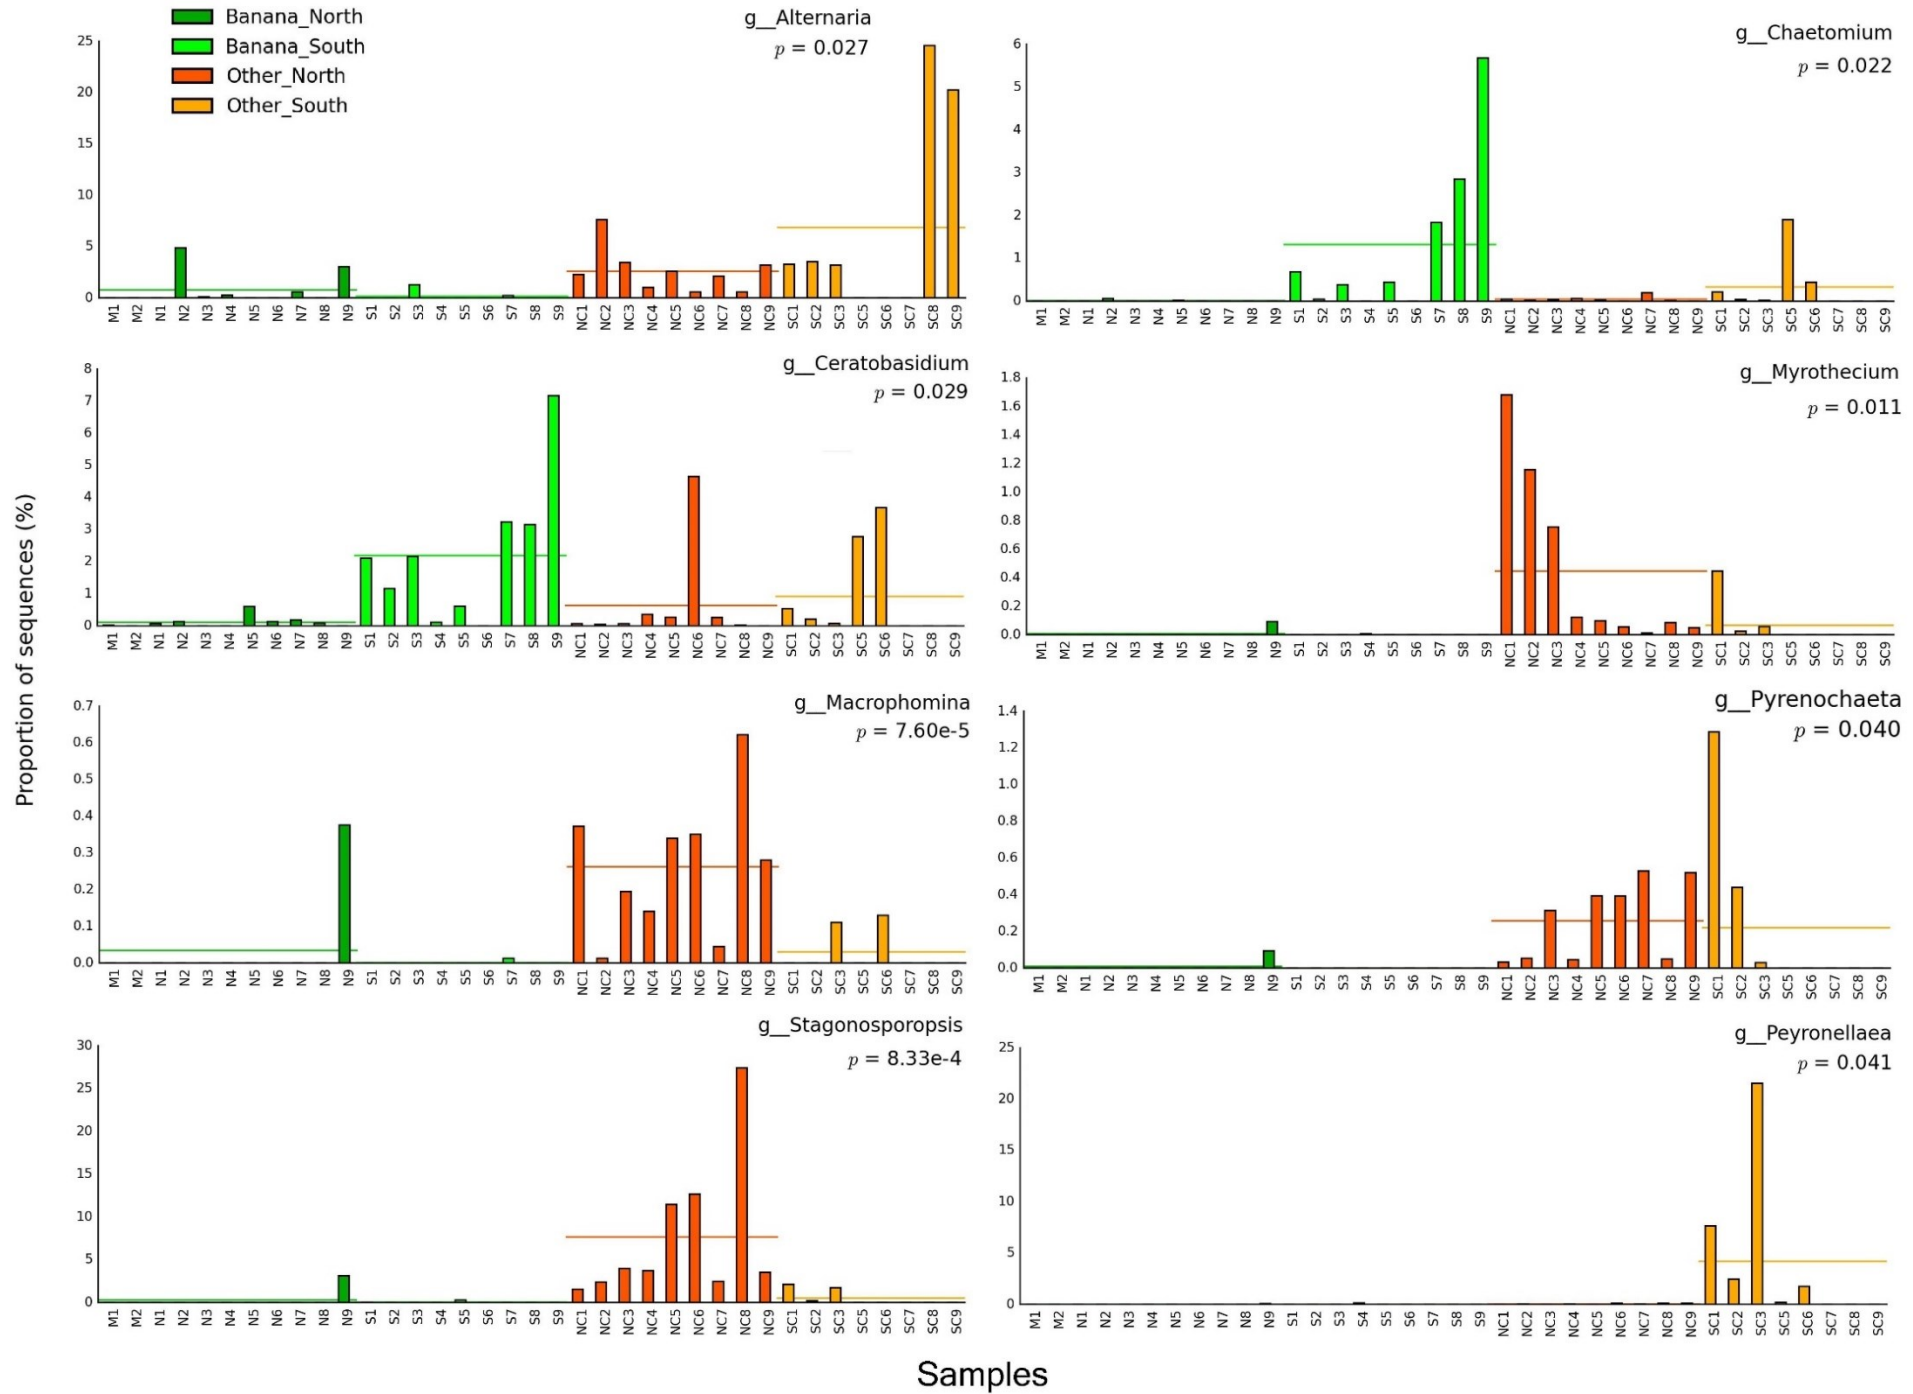

Supplement: Image_5.pdf [file Image_5.pdf]
